# Supplementary material for: Consumer Perception and Liking of Parmigiano Reggiano Protected Designation of Origin (PDO) Cheese Produced with Milk from Cows Fed Fresh Forage vs. Dry Hay
Source: MDPI journal article supplement (doi:10.3390/foods13020309), 2024-01-18
Supplement: s1 [file s1]

Supplementary material

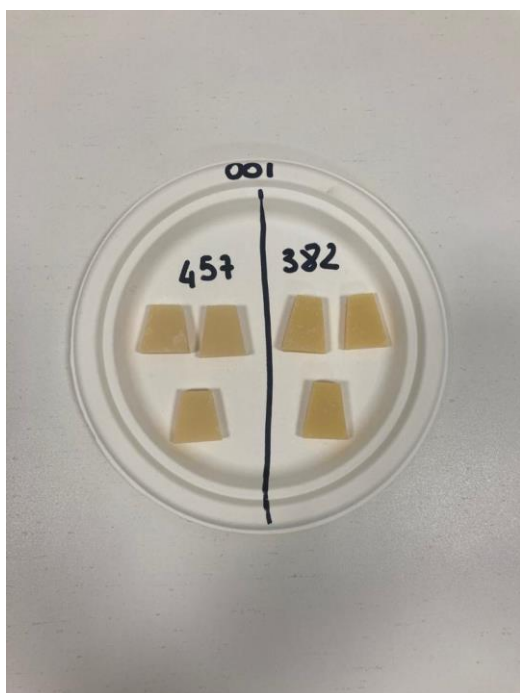

**Figure S1.** Example of sample presentation of Parmigiano Reggiano to consumers.
